# Supplementary material for: Administration of molecular hydrogen during pregnancy improves behavioral abnormalities of offspring in a maternal immune activation model
Source: PubMed Central journal article supplement (PMC6003913; doi:10.1038/s41598-018-27626-4), 2018-06-15
Supplement: 41598_2018_27626_MOESM1_ESM.pdf [file 41598_2018_27626_MOESM1_ESM.pdf]

## Supplementary information

### **Administration of molecular hydrogen during pregnancy improves behavioral abnormalities of offspring in a maternal immune activation model**

Kenji Imai<sup>a</sup>, Tomomi Kotani<sup>a</sup>, Hiroyuki Tsuda<sup>e</sup>, Tomoko Nakano<sup>a</sup>, Takafumi Ushida<sup>a</sup>, Akira Iwase<sup>a</sup>, Taku Nagai<sup>b</sup>, Shinya Toyokuni<sup>c</sup>, Akio Suzumura<sup>d</sup>, Fumitaka Kikkawa<sup>a</sup>

<sup>a</sup>Department of Obstetrics and Gynecology, <sup>b</sup>Department of Neuropsychopharmacology and Hospital Pharmacy, and <sup>c</sup>Department of Pathology and Biological Responses, Nagoya University Graduate School of Medicine, 65 Tsurumai-cho, Showa-ku, Nagoya 466-8550, Japan. <sup>d</sup>Department of Neuroimmunology, Research Institute of Environmental Medicine, Nagoya University, Furo-cho, Chikusa-ku, Nagoya 464-8601, Japan. <sup>e</sup>Department of Obstetrics and Gynecology, Japanese Red Cross Nagoya Daiichi Hospital, 3-35, Michishita-Cho, Nakamura-Ku, Nagoya, 453-8511, Japan.

Correspondence to: Tomomi Kotani, Department of Obstetrics and Gynecology, Nagoya University Graduate School of Medicine, 65 Tsurumai-cho, Showa-ku, Nagoya 466-8550, Japan, email: [itoto@med.nagoya-u.ac.jp](mailto:itoto@med.nagoya-u.ac.jp), Tel: +81-52-744-2261, Fax: +81-52-744-2268

## **Supplemental Method**

### ***DNA microarray***

Changes in astrocytic gene expression associated with LPS or H<sub>2</sub> administration were examined. Primary astrocytes were isolated from newborn mice of each group; Control group, LPS group, and HW+LPS group, as described in the Materials and Methods. Total RNA from primary astrocytes of each group were prepared using the RNeasy Mini Kit. DNA microarray experiments were performed using an Agilent Expression Array Whole Mouse Genome oligo DNA microarray (Agilent, Santa Clara, CA) at Hokkaido System Science (Sapporo, Japan) with the microarray service certified by Agilent.

**Fig. S1.** Representative images of Nissl staining in the hippocampus. The number of neurons in the hippocampus was unchanged in the LPS-treated offspring compared with the Control group. LPS, lipopolysaccharide.

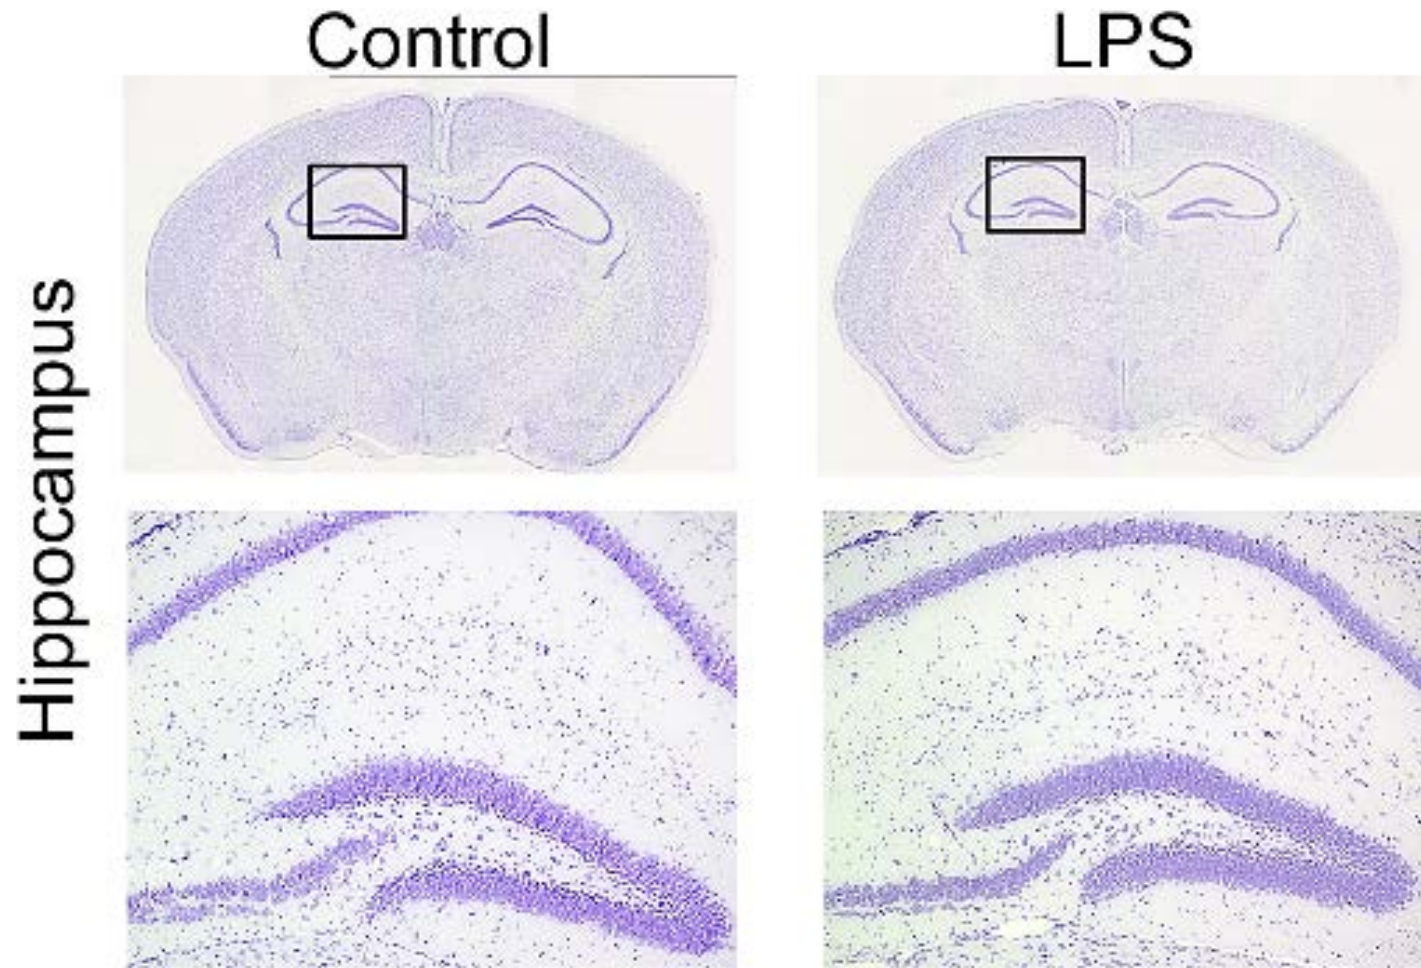

Table S1. Astrocytic genes up-regulated in LPS group compared with Control group

| GeneName      | Systematic Name | Description                                                                                                                                                       | FoldChange |
|---------------|-----------------|-------------------------------------------------------------------------------------------------------------------------------------------------------------------|------------|
| Zfp608        | AK047979        | 16 days embryo head cDNA, RIKEN full-length enriched library, clone:C130026F18 product:hypothetical Glycine-rich region containing protein, full insert sequence. | 11.95      |
| Prl2c5        | NM_181852       | prolactin family 2, subfamily c, member 5                                                                                                                         | 11.71      |
| Wnt10a        | NM_009518       | wingless-type MMTV integration site family, member 10A                                                                                                            | 8.36       |
| 2610305D13Rik | NM_145078       | RIKEN cDNA 2610305D13 gene                                                                                                                                        | 8.33       |
| Nell1         | NM_001037906    | NEL-like 1                                                                                                                                                        | 7.43       |
| Stc2          | NM_011491       | stanniocalcin 2                                                                                                                                                   | 5.72       |
| Crct1         | NM_028798       | cysteine-rich C-terminal 1                                                                                                                                        | 5.38       |
| 1700003E24Rik | NR_103799       | RIKEN cDNA 1700003E24 gene, non-coding RNA                                                                                                                        | 4.39       |
| Xaf1          | NM_001037713    | XIAP associated factor 1, transcript variant 1                                                                                                                    | 4.11       |
| Myh8          | NM_177369       | myosin, heavy polypeptide 8, skeletal muscle, perinatal                                                                                                           | 4.11       |
| Slit3         | NM_011412       | slit homolog 3 (Drosophila)                                                                                                                                       | 4.11       |
| Il19          | NM_001009940    | interleukin 19                                                                                                                                                    | 4.09       |
| 1700084M14Rik | NR_126536       | RIKEN cDNA 1700084M14 gene, non-coding RNA                                                                                                                        | 4.06       |
| Tacr1         | NM_009313       | tachykinin receptor 1                                                                                                                                             | 4.04       |
| 1700019M22Rik | NR_103800       | RIKEN cDNA 1700019M22 gene, non-coding RNA                                                                                                                        | 4.03       |
| Kcnn4         | NM_008433       | potassium intermediate/small conductance calcium-activated channel, subfamily N, member 4, transcript variant 1                                                   | 4.03       |
| BC024984      | BC024984        | cDNA clone IMAGE:5028619, partial cds.                                                                                                                            | 3.98       |
| Il7           | NM_008371       | interleukin 7                                                                                                                                                     | 3.95       |
| Anxa8         | NM_013473       | annexin A8, transcript variant 1                                                                                                                                  | 3.95       |
| Aasdh         | NM_173765       | aminoadipate-semialdehyde dehydrogenase                                                                                                                           | 3.94       |
| Il19          | NM_001009940    | interleukin 19                                                                                                                                                    | 3.94       |
| Artn          | NM_001284192    | artemin, transcript variant 2                                                                                                                                     | 3.88       |
| Il7r          | NM_008372       | interleukin 7 receptor                                                                                                                                            | 3.85       |
| Mz11          | NM_175245       | mitotic spindle organizing protein 1                                                                                                                              | 3.78       |
| Ccl20         | NM_016960       | chemokine (C-C motif) ligand 20, transcript variant 1                                                                                                             | 3.65       |
| Kcnn4         | NM_001163510    | potassium intermediate/small conductance calcium-activated channel, subfamily N, member 4, transcript variant 2                                                   | 3.63       |
| Nkain2        | NM_001013411    | Na+/K+ transporting ATPase interacting 2, transcript variant 1                                                                                                    | 3.52       |
| Adrb3         | NM_013462       | adrenergic receptor, beta 3                                                                                                                                       | 3.52       |
| Pgam2         | NM_018870       | phosphoglycerate mutase 2                                                                                                                                         | 3.51       |
| Cyp4f18       | NM_024444       | cytochrome P450, family 4, subfamily f, polypeptide 18                                                                                                            | 3.51       |
| Foxf1         | NM_010426       | forkhead box F1                                                                                                                                                   | 3.50       |
| Gata3         | NM_008091       | GATA binding protein 3                                                                                                                                            | 3.49       |
| Prex2         | NM_029525       | phosphatidylinositol-3,4,5-trisphosphate-dependent Rac exchange factor 2, transcript variant 1                                                                    | 3.49       |
| Gm8909        | NM_001081032    | predicted gene 8909                                                                                                                                               | 3.37       |
| Klhdc8a       | NM_144810       | kelch domain containing 8A                                                                                                                                        | 3.28       |
| Itga3         | NM_013565       | integrin alpha 3, transcript variant 1                                                                                                                            | 3.27       |
| Cd34          | NM_133654       | CD34 antigen, transcript variant 2                                                                                                                                | 3.25       |
| Scn5a         | NM_021544       | sodium channel, voltage-gated, type V, alpha, transcript variant 1                                                                                                | 3.18       |
| Kcni1         | NM_001290690    | Kv channel-interacting protein 1, transcript variant D                                                                                                            | 3.18       |
| Sema3f        | NM_011349       | sema domain, immunoglobulin domain (Ig), short basic domain, secreted, (semaphorin) 3F                                                                            | 3.16       |
| Wisp2         | NM_016873       | WNT1 inducible signaling pathway protein 2                                                                                                                        | 3.08       |
| Tspan11       | NM_026743       | tetraspanin 11                                                                                                                                                    | 3.08       |
| Rgs1          | NM_015811       | regulator of G-protein signaling 1                                                                                                                                | 3.06       |
| Scx           | NM_198885       | scleraxis                                                                                                                                                         | 3.05       |
| Prelp         | NM_054077       | proline arginine-rich end leucine-rich repeat                                                                                                                     | 3.04       |
| Cpxm2         | NM_018867       | carboxypeptidase X 2 (M14 family)                                                                                                                                 | 3.04       |
| Prelp         | NM_054077       | proline arginine-rich end leucine-rich repeat                                                                                                                     | 3.02       |
| Slc25a17      | NM_011399       | solute carrier family 25 (mitochondrial carrier, peroxisomal membrane protein), member 17                                                                         | 3.01       |

Table S2. Astrocytic genes down-regulated in LPS group compared with Control group

| GeneName                 | Systematic Name          | Description                                                                       | FoldChange |
|--------------------------|--------------------------|-----------------------------------------------------------------------------------|------------|
| Qprt                     | NM_133686                | quinolinate phosphoribosyltransferase                                             | 0.017      |
| Serpina3g                | NM_009251                | serine (or cysteine) peptidase inhibitor, clade A, member 3G                      | 0.025      |
| Otor                     | NM_020595                | otoraplin                                                                         | 0.026      |
| Hp                       | NM_017370                | haptoglobin (Hp)                                                                  | 0.036      |
| Serpina1c                | NM_173051                | serine (or cysteine) peptidase inhibitor, clade B, member 1c                      | 0.040      |
| Serpina1a                | NM_025429                | serine (or cysteine) peptidase inhibitor, clade B, member 1a                      | 0.041      |
| Sfrp4                    | NM_016687                | secreted frizzled-related protein 4                                               | 0.042      |
| Cxcl12                   | NM_001012477             | chemokine (C-X-C motif) ligand 12, transcript variant 3                           | 0.045      |
| Gjb2                     | NM_008125                | gap junction protein, beta 2                                                      | 0.047      |
| Lgi2                     | NM_144945                | leucine-rich repeat LGI family, member 2                                          | 0.055      |
| Ccl8                     | NM_021443                | chemokine (C-C motif) ligand 8                                                    | 0.064      |
| Gper1                    | NM_029771                | G protein-coupled estrogen receptor 1                                             | 0.064      |
| Efemp1                   | NM_146015                | epidermal growth factor-containing fibulin-like extracellular matrix protein 1    | 0.074      |
| Lrrc32                   | NM_001113379             | leucine rich repeat containing 32                                                 | 0.078      |
| Dio2                     | NM_010050                | deiodinase, iodothyronine, type II                                                | 0.079      |
| Moxd1                    | NM_021509                | monooxygenase, DBH-like 1                                                         | 0.082      |
| Efemp1                   | NM_146015                | epidermal growth factor-containing fibulin-like extracellular matrix protein 1    | 0.086      |
| Cxcl12                   | NM_021704                | chemokine (C-X-C motif) ligand 12, transcript variant 1                           | 0.092      |
| Pear1                    | NM_028460                | platelet endothelial aggregation receptor 1, transcript variant 1                 | 0.096      |
| Fbn2                     | NM_010181                | fibrillin 2                                                                       | 0.098      |
| Six2                     | NM_011380                | sine oculis-related homeobox 2                                                    | 0.098      |
| 583041710Rik             | NR_028359                | RIKEN cDNA 583041710 gene                                                         | 0.098      |
| Fbn2                     | NM_010181                | fibrillin 2                                                                       | 0.098      |
| 9030619P08Rik            | NR_108041                | RIKEN cDNA 9030619P08 gene, non-coding RNA                                        | 0.100      |
| Col1a2                   | NM_007743                | collagen, type I, alpha 2                                                         | 0.100      |
| chr1:93812836-93816128_F | chr1:93812836-93816128_F | lincRNA:chr1:93812836-93816128 forward strand                                     | 0.105      |
| Cpz                      | NM_153107                | carboxypeptidase Z                                                                | 0.110      |
| Cited4                   | NM_019563                | Cbp/p300-interacting transactivator, with Glu/Asp-rich carboxy-terminal domain, 4 | 0.111      |
| Vtn                      | NM_011707                | vitronectin                                                                       | 0.112      |
| Tbx18                    | NM_023814                | T-box18                                                                           | 0.113      |
| Eng                      | NM_001146350             | endoglin, transcript variant 2                                                    | 0.113      |
| Gm14625                  | NM_001220498             | predicted gene 14625                                                              | 0.115      |
| Ptchd1                   | NM_001093750             | patched domain containing 1                                                       | 0.118      |
| Gdf10                    | NM_145741                | growth differentiation factor 10                                                  | 0.119      |
| Epha7                    | NM_001122889             | Eph receptor A7, transcript variant 2                                             | 0.127      |
| Ly6a                     | NM_010738                | lymphocyte antigen 6 complex, locus A, transcript variant 3                       | 0.132      |
| Gas2                     | NM_008087                | growth arrest specific 2                                                          | 0.132      |
| Rab15                    | NM_134050                | RAB15, member RAS oncogene family                                                 | 0.133      |
| D630010B17Rik            | NR_045629                | RIKEN cDNA D630010B17 gene, long non-coding RNA                                   | 0.133      |
| Ly6c2                    | NM_001099217             | lymphocyte antigen 6 complex, locus C2                                            | 0.134      |
| Adra2a                   | NM_007417                | adrenergic receptor, alpha 2a                                                     | 0.136      |
| Ly6c1                    | NM_001252055             | lymphocyte antigen 6 complex, locus C1, transcript variant 2                      | 0.137      |
| Ctsk                     | NM_007802                | cathepsin K                                                                       | 0.137      |
| Dcn                      | NM_007833                | decorin, transcript variant 2                                                     | 0.138      |
| Mgp                      | NM_008597                | matrix Gla protein                                                                | 0.139      |
| Adm                      | NM_009627                | adrenomedullin                                                                    | 0.140      |

Table S3. Astrocytic genes up-regulated in HW + LPS group compared with LPS group

| GeneName                   | Systematic Name            | Description                                                                                                                                              | FoldChange |
|----------------------------|----------------------------|----------------------------------------------------------------------------------------------------------------------------------------------------------|------------|
| Xaf1                       | NM_001037713               | XIAP associated factor 1, transcript variant 1                                                                                                           | 5.19       |
| Eif2s3y                    | NM_012011                  | eukaryotic translation initiation factor 2, subunit 3, structural gene Y-linked                                                                          | 4.99       |
| Mmp8                       | NM_008611                  | matrix metalloproteinase 8                                                                                                                               | 4.38       |
| 5830417110Rik              | NR_028359                  | RIKEN cDNA 5830417110 gene, non-coding RNA                                                                                                               | 3.90       |
| Tesc1                      | NM_001163810               | tescalcin-like                                                                                                                                           | 3.06       |
| Slc6a12                    | NM_133661                  | solute carrier family 6 (neurotransmitter transporter, betaine/GABA), member 12                                                                          | 2.98       |
| Ms4a4a                     | XM_006543453               | ref PREDICTED: Mus musculus membrane-spanning 4-domains, subfamily A, member 4A                                                                          | 2.84       |
| Pf4                        | NM_019932                  | platelet factor 4                                                                                                                                        | 2.78       |
| Stac2                      | NM_146028                  | SH3 and cysteine rich domain 2                                                                                                                           | 2.60       |
| Xlr4b                      | NM_021365                  | X-linked lymphocyte-regulated 4B, transcript variant 1                                                                                                   | 2.58       |
| Plbd1                      | NM_025806                  | phospholipase B domain containing 1                                                                                                                      | 2.54       |
| Clec4n                     | NM_020001                  | C-type lectin domain family 4, member n, transcript variant 1                                                                                            | 2.53       |
| Saa2                       | NM_011314                  | serum amyloid A 2                                                                                                                                        | 2.53       |
| Bst1                       | NM_009763                  | bone marrow stromal cell antigen 1                                                                                                                       | 2.49       |
| Pira2                      | NM_011089                  | paired-Ig-like receptor A2                                                                                                                               | 2.39       |
| Hist1h4d                   | NM_175654                  | histone cluster 1, H4d                                                                                                                                   | 2.38       |
| AW551984                   | NM_001199556               | expressed sequence AW551984, transcript variant 1                                                                                                        | 2.38       |
| Ahr                        | NM_009644                  | aryl-hydrocarbon receptor repressor                                                                                                                      | 2.37       |
| Entpd3                     | NM_178676                  | ectonucleoside triphosphate diphosphohydrolase 3                                                                                                         | 2.37       |
| Lclat1                     | NM_001081071               | lysocardiolipin acyltransferase, transcript variant 1                                                                                                    | 2.35       |
| chr17:22420025-22457650_R  | chr17:22420025-22457650_R  | lincRNA:chr17:22420025-22457650 reverse strand                                                                                                           | 2.33       |
| Fcml                       | NM_026976                  | Fas apoptotic inhibitory molecule 3                                                                                                                      | 2.28       |
| H2-M2                      | NM_008204                  | histocompatibility 2, M region locus 2                                                                                                                   | 2.27       |
| Gm15698                    | NR_003564                  | predicted gene 15698, non-coding RNA                                                                                                                     | 2.27       |
| Coch                       | NM_007728                  | coagulation factor C homolog (Limulus polyphemus), transcript variant 1                                                                                  | 2.26       |
| Cxcl12                     | NM_021704                  | chemokine (C-X-C motif) ligand 12, transcript variant 1                                                                                                  | 2.26       |
| Pcsk5                      | NM_001163144               | proprotein convertase subtilisin/kexin type 5, transcript variant 2                                                                                      | 2.24       |
| Lyzl4                      | NM_026915                  | lysozyme-like 4                                                                                                                                          | 2.23       |
| chr2:132079092-132087069_F | chr2:132079092-132087069_F | lincRNA:chr2:132079092-132087069 forward strand                                                                                                          | 2.23       |
| Clec4b1                    | NM_027218                  | C-type lectin domain family 4, member b1, transcript variant 2                                                                                           | 2.23       |
| Mapk13                     | NM_011950                  | mitogen-activated protein kinase 13                                                                                                                      | 2.23       |
| Lcn2                       | NM_008491                  | lipocalin 2                                                                                                                                              | 2.22       |
| Smoc2                      | AK040109                   | 0 day neonate thymus cDNA, RIKEN full-length enriched library, clone:A430062115 product:secreted modular calcium binding protein 2, full insert sequence | 2.17       |
| Pdgfr                      | ENSMUST00000058692         | ens platelet-derived growth factor, D polypeptide                                                                                                        | 2.17       |
| Xlr3b                      | NM_001081643               | X-linked lymphocyte-regulated 3B                                                                                                                         | 2.16       |
| Alox5                      | NM_009662                  | arachidonate 5-lipoxygenase                                                                                                                              | 2.15       |
| Hist1h4k                   | NM_178211                  | histone cluster 1, H4k                                                                                                                                   | 2.14       |
| Pla2g2d                    | NM_011109                  | phospholipase A2, group IID                                                                                                                              | 2.13       |
| Pilrb1                     | NM_133209                  | paired immunoglobulin-like type 2 receptor beta 1                                                                                                        | 2.11       |
| Emb                        | NM_010330                  | embigin                                                                                                                                                  | 2.06       |
| Fxyd2                      | NM_052823                  | FXYD domain-containing ion transport regulator 2, transcript variant b,                                                                                  | 2.05       |
| Syt6                       | NM_018800                  | synaptotagmin VI, transcript variant 1                                                                                                                   | 2.03       |
| Tfec                       | NM_031198                  | transcription factor EC                                                                                                                                  | 2.03       |
| Pira11                     | NM_011088                  | paired-Ig-like receptor A11                                                                                                                              | 2.01       |
| Gm14548                    | NM_001166672               | predicted gene 14548                                                                                                                                     | 2.01       |

Table S4. Astrocytic genes down-regulated in HW + LPS group compared with LPS group

| GeneName      | Systematic Name    | Description                                                                                                 | FoldChange |
|---------------|--------------------|-------------------------------------------------------------------------------------------------------------|------------|
| Zranb2        | NM_017381          | zinc finger, RAN-binding domain containing 2                                                                | 0.084      |
| Lum           | NM_008524          | lumican                                                                                                     | 0.154      |
| Igf2          | NM_010514          | insulin-like growth factor 2, transcript variant 1                                                          | 0.222      |
| Cxcl15        | NM_011339          | chemokine (C-X-C motif) ligand 15                                                                           | 0.224      |
| Piezo2        | NM_001039485       | piezo-type mechanosensitive ion channel component 2                                                         | 0.238      |
| Odf3b         | NM_001013022       | outer dense fiber of sperm tails 3B                                                                         | 0.262      |
| Plac9a        | NM_207229          | placenta specific 9a                                                                                        | 0.267      |
| Fam216b       | NM_177629          | family with sequence similarity 216, member B                                                               | 0.282      |
| Wnt6          | NM_009526          | wingless-type MMTV integration site family, member 6                                                        | 0.291      |
| Cdhr4         | ENSMUST00000177226 | ens/cadherin-related family member 4                                                                        | 0.304      |
| St3gal3       | NM_009176          | ST3 beta-galactoside alpha-2,3-sialyltransferase 3                                                          | 0.308      |
| Cftr          | NM_021050          | cystic fibrosis transmembrane conductance regulator                                                         | 0.314      |
| Sdk1          | NM_177879          | sidekick homolog 1 (chicken)                                                                                | 0.314      |
| Rarb          | NM_001289760       | retinoic acid receptor, beta, transcript variant beta3                                                      | 0.314      |
| Ucma          | NM_026754          | upper zone of growth plate and cartilage matrix associated, transcript variant 1                            | 0.316      |
| Bbox1         | NM_130452          | butyrobetaine (gamma), 2-oxoglutarate dioxygenase 1 (gamma-butyrobetaine hydroxylase)                       | 0.318      |
| Spon2         | NM_133903          | spondin 2, extracellular matrix protein                                                                     | 0.336      |
| Mrgprf        | NM_145379          | MAS-related GPR, member F                                                                                   | 0.337      |
| Aldh1a2       | NM_009022          | aldehyde dehydrogenase family 1, subfamily A2                                                               | 0.338      |
| Olfm3         | ENSMUST00000154145 | ens/olfactomedin-like 3                                                                                     | 0.339      |
| Prss35        | ENSMUST00000036426 | ens/protease, serine 35                                                                                     | 0.350      |
| Ucma          | NM_001113558       | upper zone of growth plate and cartilage matrix associated, transcript variant 2                            | 0.351      |
| Xist          | NR_001570          | inactive X specific transcripts, transcript variant 2, long non-coding RNA                                  | 0.352      |
| Epha3         | NM_010140          | Eph receptor A3                                                                                             | 0.354      |
| H19           | NR_130973          | H19, imprinted maternally expressed transcript, transcript variant 1, long non-coding RNA                   | 0.361      |
| Ntsr2         | NM_008747          | neurotensin receptor 2                                                                                      | 0.362      |
| Sema3d        | NM_028882          | sema domain, immunoglobulin domain (Ig), short basic domain, secreted, (semaphorin) 3D                      | 0.366      |
| XIST          | XIST               | lincRNA:chrX:100655711-100678572 reverse strand                                                             | 0.370      |
| Miat          | NR_033657          | myocardial infarction associated transcript (non-protein coding), transcript variant 1, long non-coding RNA | 0.377      |
| Col2a1        | NM_031163          | collagen, type II, alpha 1, transcript variant 1                                                            | 0.378      |
| Epha3         | NM_010140          | Eph receptor A3                                                                                             | 0.382      |
| Lect1         | NM_010701          | leukocyte cell derived chemotaxin 1                                                                         | 0.382      |
| Mchr1         | NM_145132          | melanin-concentrating hormone receptor 1                                                                    | 0.383      |
| Pifo          | NM_029604          | primary cilia formation, transcript variant 2                                                               | 0.385      |
| Npy           | NM_023456          | neuropeptide Y                                                                                              | 0.388      |
| Md1           | NM_001290505       | midline 1, transcript variant 4                                                                             | 0.391      |
| Vill          | NM_001164567       | villin-like, transcript variant 1                                                                           | 0.392      |
| Rarb          | NM_011243          | retinoic acid receptor, beta, transcript variant beta2                                                      | 0.395      |
| Fhad1         | NM_177868          | forkhead-associated (FHA) phosphopeptide binding domain 1                                                   | 0.396      |
| Ablim3        | NM_198649          | actin binding LIM protein family, member 3, transcript variant 1                                            | 0.398      |
| B430306N03Rik | NM_177083          | RIKEN cDNA B430306N03 gene                                                                                  | 0.402      |
| Fbln1         | NM_010180          | fibulin 1                                                                                                   | 0.405      |
| Tekt1         | NM_001282006       | tektin 1, transcript variant 1                                                                              | 0.406      |
| H2-Eb1        | NM_010382          | histocompatibility 2, class II antigen E beta                                                               | 0.408      |
| Edil3         | NM_010103          | EGF-like repeats and discoidin I-like domains 3, transcript variant 2                                       | 0.410      |
| Cmtm5         | NM_026066          | CKLF-like MARVEL transmembrane domain containing 5, transcript variant 2                                    | 0.410      |
| Fgf7          | NM_008008          | fibroblast growth factor 7                                                                                  | 0.411      |
